# Supplementary material
Source: Springer Nature journal article supplement (https://www.springermedizin.de/resource/supplementary/12960_2006_74_MOESM1_ESM.pdf/9570410)
Supplement: MOESM1 [file 9570410]

BEFORE

(7/1/04-11/30/04)

---

New Patient

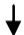

Triage Nurse

(Order CD4 count)

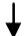

MD/MO

(Interpret CD4 result/stage)

AFTER

(12/1/04-4/30/05)

---

New Patient

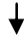

CD4 nurse

(Order CD4 count)

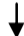

CD4 nurse

(Interpret CD4 result/stage)

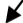

HAART-eligible  
(to HAART pathway)\*

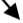

Non-HAART eligible  
Return to CD4 nurse

\*= MD/MO/Social worker/Activist
